# Supplementary material for: Characterization of the Relationship between the Chaperone and Lipid-Binding Functions of the 70-kDa Heat-Shock Protein, HspA1A
Source: MDPI journal article supplement (doi:10.3390/ijms21175995), 2020-08-20

Characterization of the relationship between the chaperone and lipid-binding functions of the 70-kDa heat-shock protein, HspA1A

Larissa Smulders<sup>1</sup>, Amanda J Daniels<sup>1</sup>, Caroline B Plescia<sup>2</sup>, Devon Berger<sup>1</sup>, Robert V Stahelin<sup>2</sup>, Nikolas Nikolaidis<sup>1\*</sup>

<sup>1</sup> Department of Biological Science, Center for Applied Biotechnology Studies, and Center for Computational and Applied Mathematics, College of Natural Sciences and Mathematics, California State University Fullerton, Fullerton, CA 92834-6850, USA

<sup>2</sup> Department of Medicinal Chemistry and Molecular Pharmacology and the Purdue University Center for Cancer Research, Purdue University, West Lafayette, IN 47907, USA

\*Corresponding author: Nikolas Nikolaidis; Department of Biological Science, Center for Applied Biotechnology Studies, and Center for Computational and Applied Mathematics, College of Natural Sciences and Mathematics, California State University Fullerton, Fullerton, CA 92834-6850; Tel: 657-278-4526; e-mail: nnikolaidis@fullerton.edu)

Supplementary Information

Supplementary Table 1

Supplementary Fig. 1

**Supplementary Table 1** Statistical analyses of the experiments shown in Figures 3 and 4.

---

| <b>ATPase Rate (Fig. 3)</b> |                 |             |             |
|-----------------------------|-----------------|-------------|-------------|
| <b>Pairs</b>                | <b>p-values</b> |             |             |
|                             | <b>0-30</b>     | <b>0-60</b> | <b>0-90</b> |
| HspA1A-HspA1A+POPC          | 0.005857        | 0.008295    | 0.001005    |
| HspA1A-HspA1A+POPS          | 0.013538        | 0.001005    | 0.001005    |
| HspA1A+POPC-HspA1A+POPS     | 0.702006        | 0.107585    | 0.521428    |
| HspA1A-HspA1A+DPPC          | 0.001005        | 0.001005    | 0.001005    |
| HspA1A-HspA1A+DPPS          | 0.001005        | 0.001005    | 0.001005    |
| HspA1A+DPPC-HspA1A+DPPS     | 0.36817         | 0.282109    | 0.899995    |

  

| <b>Refolding Rate (Fig. 4)</b> |                |
|--------------------------------|----------------|
| <b>Pairs</b>                   | <b>p-value</b> |
| HspA1A-HspA1A+POPC             | 0.69703        |
| HspA1A-HspA1A+POPS             | 0.00548        |
| HspA1A-HspA1A+DPPC             | 0.24448        |
| HspA1A-HspA1A+DPPS             | 0.00101        |
| HspA1A+POPC-HspA1A+POPS        | 0.00101        |
| HspA1A+POPS-HspA1A+DPPS        | 0.67417        |
| HspA1A+DPPC-HspA1A+DPPS        | 0.02169        |

---

**Supplementary Fig. 1** HspA1A binds to liposomes containing phosphatidylserine. A single concentration of liposomes (1 mM total lipid) composed of different lipid mixtures in specified molar ratio (see figure) was incubated with 1  $\mu$ M of protein. After centrifugation, the extent of lipid-protein binding was determined by comparing the amount of protein that remained in the supernatant to the amount of protein that was pelleted. Representative SDS-PAGE gel electrophoresis of the supernatant (S) and pellet (P) fractions of HspA1A (two separate batches) with liposomes composed of different PC and PS lipid species.

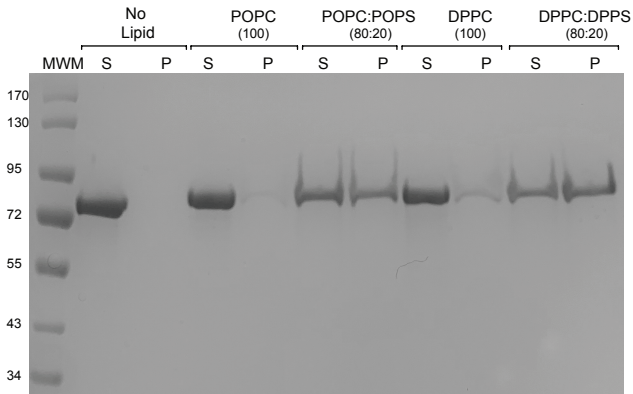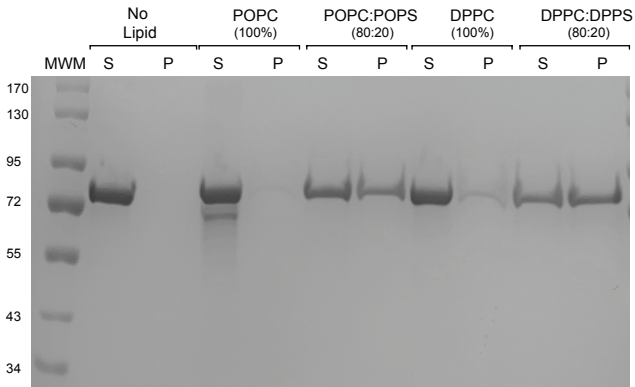

Supplement: s1 [file s1]
